# Supplementary material for: CRISPR Inhibition of Prophage Acquisition in Streptococcus pyogenes
Source: PubMed Central journal article supplement (PMC3089615; doi:10.1371/journal.pone.0019543), 2011-05-06

- ▼ prophage
- ICE
- ◆ CRISPR
- ◇ terminal repeat-like sequence only
- cas genes

- M1 SF370 (4φ, 1 ICE)
- M1 MGAS5005 (3φ, 1 ICE)
- M2 MGAS10270 (5φ, 2 ICE)
- M3 MGAS315 (6φ, 0 ICE)
- M3 SSI-1 (6φ, 0 ICE)
- M4 MGAS10750 (4φ, 2 ICE)
- M5 *Manfredo* (5φ, 0 ICE)
- M6 MGAS10394 (8φ, 0 ICE)
- M12 MGAS2096 (2φ, 2 ICE)
- M12 MGAS9429 (3φ, 1 ICE)
- M18 MGAS8232 (5φ, 0 ICE)
- M28 MGAS6180 (4φ, 3 ICE)
- M49 NZ131 (3φ, 0 ICE)

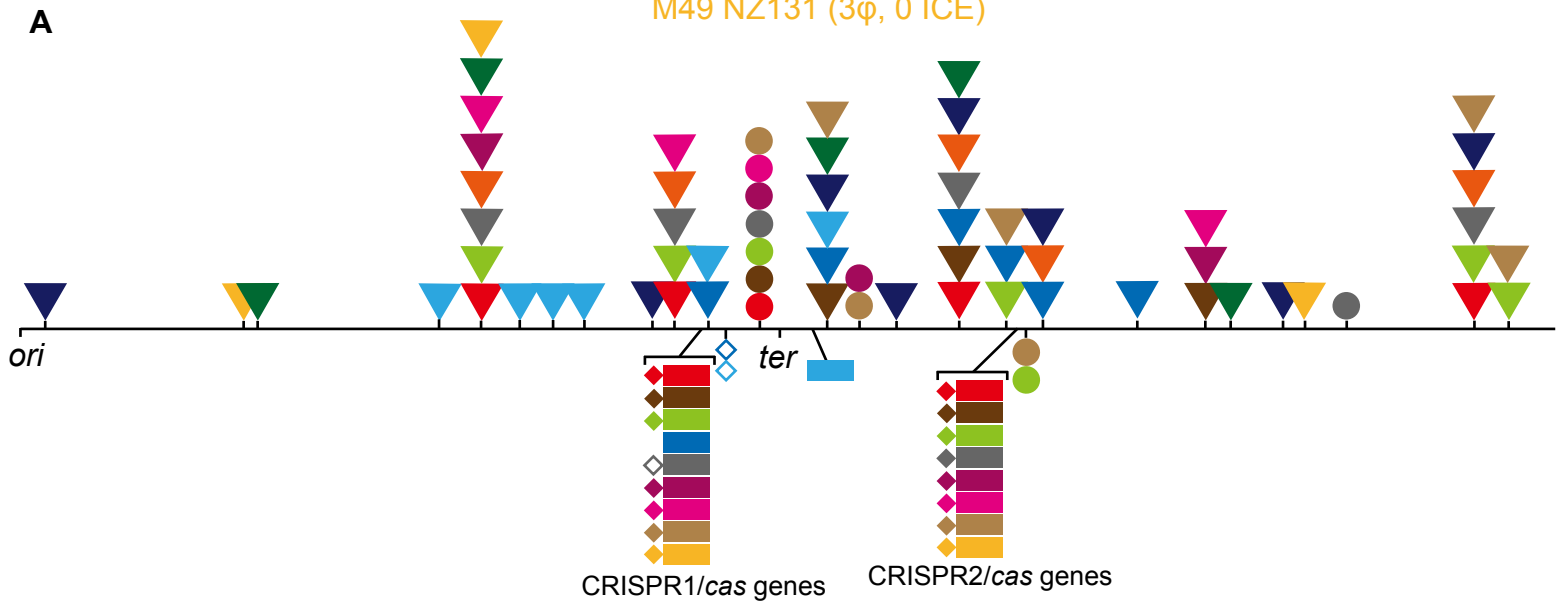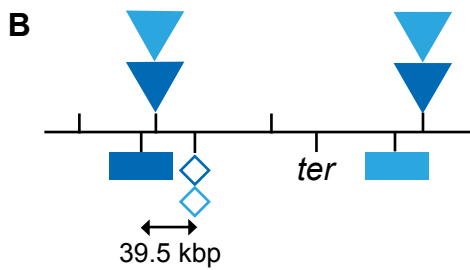

Supplement: pone.0019543.s001.pdf [file pone.0019543.s001.pdf]
