# Supplementary material for: CRISPR Inhibition of Prophage Acquisition in Streptococcus pyogenes
Source: PubMed Central journal article supplement (PMC3089615; doi:10.1371/journal.pone.0019543), 2011-05-06

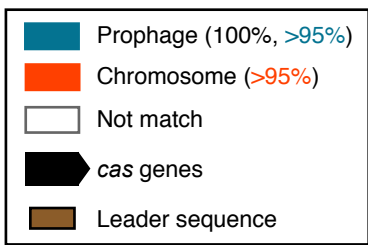

CRISPR1

CRISPR2

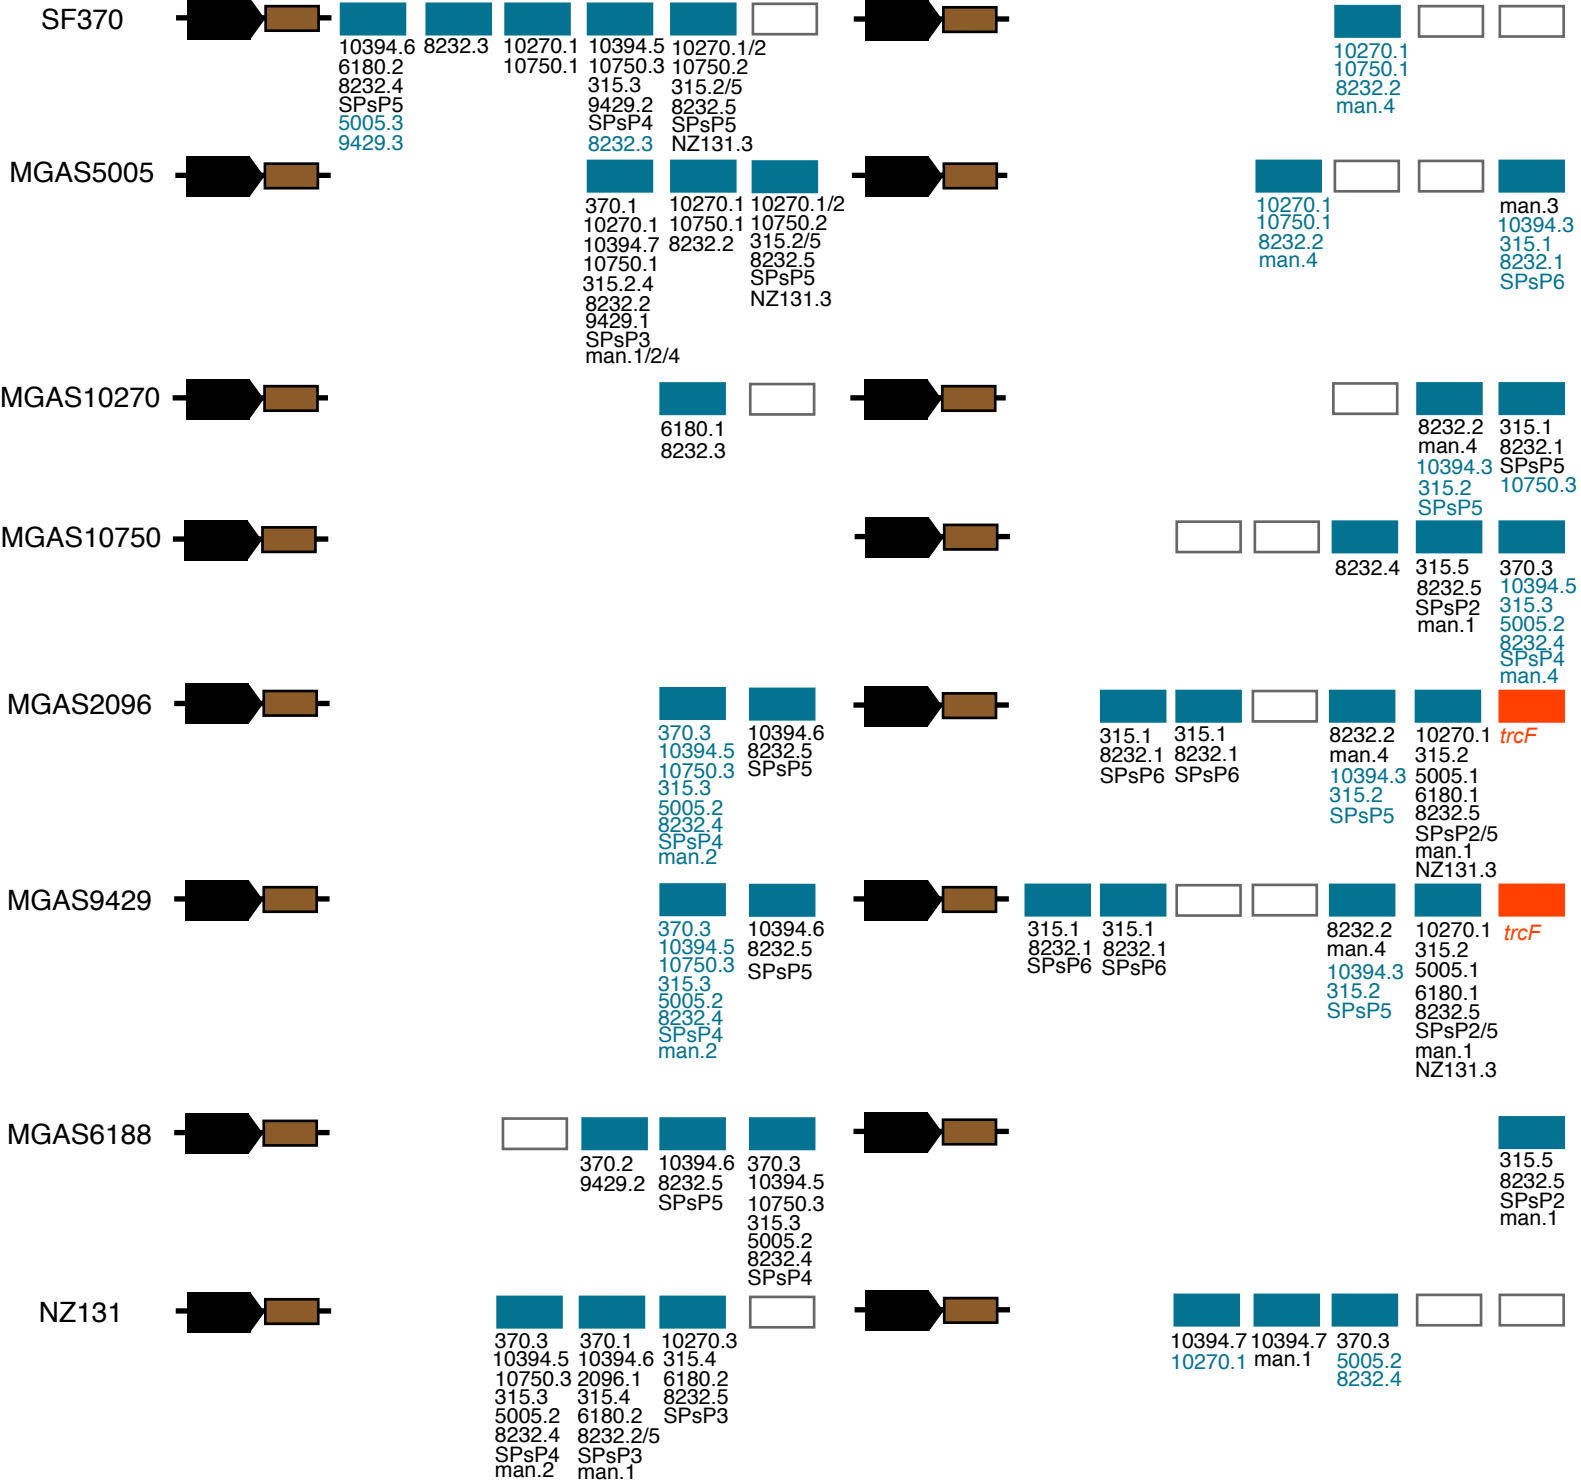

Supplement: pone.0019543.s003.pdf [file pone.0019543.s003.pdf]
