# Supplementary material for: CRISPR Inhibition of Prophage Acquisition in Streptococcus pyogenes
Source: PubMed Central journal article supplement (PMC3089615; doi:10.1371/journal.pone.0019543), 2011-05-06
Supplement: pone.0019543.s004.pdf [file pone.0019543.s004.pdf]

|                                                       | Prophage | CRISPR | Repeats |
|-------------------------------------------------------|----------|--------|---------|
| <i>Streptococcus agalactiae</i> 2603V/R               | 3        | 1      | 25      |
| <i>Streptococcus agalactiae</i> A909                  | 3        | 1      | 15      |
| <i>Streptococcus agalactiae</i> NEM316                | 3        | 1      | 14      |
| <i>Streptococcus dysgalactiae</i> equisimilis GGS 124 | 2        | 1      | 19      |
| <i>Streptococcus equi</i> equi 4047                   | 4        | 0      | 0       |
| <i>Streptococcus equi</i> zooepidemicus H70           | 1        | 1      | 19      |
| <i>Streptococcus equi</i> zooepidemicus MGCS10565     | 1        | 1      | 28      |
| <i>Streptococcus gallolyticus</i> UCN34               | 1        | 2      | 29      |
| <i>Streptococcus gordonii</i> Challis CH1             | 0        | 1      | 27      |
| <i>Streptococcus mitis</i> B6                         | 1        | 0      | 0       |
| <i>Streptococcus mutans</i> NN2025                    | 0        | 2      | 89      |
| <i>Streptococcus mutans</i> UA159                     | 0        | 2      | 6       |
| <i>Streptococcus pneumoniae</i> ATCC700669            | 1        | 0      | 0       |
| <i>Streptococcus pneumoniae</i> 70585                 | 2        | 0      | 0       |
| <i>Streptococcus pneumoniae</i> CGSP14                | 0        | 0      | 0       |
| <i>Streptococcus pneumoniae</i> D3                    | 0        | 0      | 0       |
| <i>Streptococcus pneumoniae</i> G54                   | 0        | 0      | 0       |
| <i>Streptococcus pneumoniae</i> Hungary 19A-6         | 4        | 0      | 0       |
| <i>Streptococcus pneumoniae</i> JJA                   | 2        | 0      | 0       |
| <i>Streptococcus pneumoniae</i> P1031                 | 2        | 0      | 0       |
| <i>Streptococcus pneumoniae</i> R6                    | 0        | 0      | 0       |
| <i>Streptococcus pneumoniae</i> Taiwan19F-14          | 3        | 0      | 0       |
| <i>Streptococcus pneumoniae</i> TCH8431/19A           | 3        | 0      | 0       |
| <i>Streptococcus pneumoniae</i> TIGR4                 | 0        | 0      | 0       |
| <i>Streptococcus pyogenes</i> SF370                   | 4        | 2      | 11      |
| <i>Streptococcus pyogenes</i> MGAS5005                | 3        | 2      | 9       |
| <i>Streptococcus pyogenes</i> MGAS8232                | 6        | 0      | 0       |
| <i>Streptococcus pyogenes</i> MGAS6180                | 4        | 2      | 7       |
| <i>Streptococcus pyogenes</i> SSI-1                   | 6        | 0      | 1       |
| <i>Streptococcus pyogenes</i> NZ131                   | 3        | 2      | 9       |
| <i>Streptococcus pyogenes</i> MGAS10394               | 8        | 0      | 0       |
| <i>Streptococcus pyogenes</i> Manfredo                | 5        | 0      | 0       |
| <i>Streptococcus pyogenes</i> MGAS10270               | 5        | 2      | 7       |
| <i>Streptococcus pyogenes</i> MGAS10750               | 4        | 2      | 7       |
| <i>Streptococcus pyogenes</i> MGAS2096                | 2        | 2      | 10      |
| <i>Streptococcus pyogenes</i> MGAS9429                | 3        | 2      | 11      |
| <i>Streptococcus pyogenes</i> MGAS315                 | 6        | 0      | 1       |
| <i>Streptococcus sanguinis</i> SK36                   | 0        | 3      | 42      |
| <i>Streptococcus suis</i> 05ZYH33                     | 0        | 0      | 0       |
| <i>Streptococcus suis</i> 98HAH33                     | 1        | 0      | 0       |
| <i>Streptococcus suis</i> BM407                       | 1        | 0      | 0       |
| <i>Streptococcus suis</i> GZ1                         | 1        | 0      | 0       |
| <i>Streptococcus suis</i> P1/7                        | 1        | 0      | 0       |
| <i>Streptococcus suis</i> SC84                        | 1        | 0      | 0       |
| <i>Streptococcus thermophilus</i> CNRZ 1066           | 0        | 1      | 42      |
| <i>Streptococcus thermophilus</i> LMD-9               | 3        | 3      | 30      |
| <i>Streptococcus thermophilus</i> LMG18311            | 0        | 3      | 43      |
| <i>Streptococcus uberis</i> 04140J                    | 1        | 0      | 0       |
