# Supplementary material for: CRISPR Inhibition of Prophage Acquisition in Streptococcus pyogenes
Source: PubMed Central journal article supplement (PMC3089615; doi:10.1371/journal.pone.0019543), 2011-05-06
Supplement: pone.0019543.s005.pdf [file pone.0019543.s005.pdf]

**Table S1. Repeat sequences of *S. pyogenes* CRISPR.**

| CRISPR  | Strain    | Typical repeat sequence              | Terminal repeat sequence <sup>a</sup>          |
|---------|-----------|--------------------------------------|------------------------------------------------|
| CRISPR1 | SF370     | GTTTATAGAGCTATGCTGTTTTGAATGGTCCCAAAC | GTTTATAGAGCTATGCTGTTTTGAATGGTCTCCATTC          |
|         | MGAS5005  | GTTTATAGAGCTATGCTGTTTTGAATGGTCCCAAAC | GTTTATAGAGCTATGCTGTTTTGAATGGTCTCCATTC          |
|         | MGAS10270 | GTTTATAGAGCTATGCTGTTTTGAATGGTCCCAAAC | GTTTATAGAGCTATGCTGTTTTGAATGGTCTCCATTC          |
|         | MGAS315   | - <sup>b</sup>                       | GTTT <b>AC</b> GAGCTATGCTGTTTTGAATGGTCTCCATTC  |
|         | SSI-1     | - <sup>b</sup>                       | GTTT <b>AC</b> GAGCTATGCTGTTTTGAATGGTCTCCATTC  |
|         | MGAS10750 | - <sup>b</sup>                       | GTTTATAGAGCTATGCTGTTTTGAG <b>T</b> GGTCTCCATTC |
|         | MGAS2096  | GTTTATAGAGCTATGCTGTTTTGAATGGTCCCAAAC | GTTTATAGAGCTATGCTGTTTTGAATGGTCTCCATTC          |
|         | MGAS9429  | GTTTATAGAGCTATGCTGTTTTGAATGGTCCCAAAC | GTTTATAGAGCTATGCTGTTTTGAATGGTCTCCATTC          |
|         | MGAS6180  | GTTTATAGAGCTATGCTGTTTTGAATGGTCCCAAAC | GTTTATAGAGCTATGCTGTTTTGAATGGTCTCCATTC          |
|         | NZ131     | GTTTATAGAGCTATGCTGTTTTGAATGGTCCCAAAC | GTTTATAGAGCTATGCTGT <b>C</b> TTGAATGGTCTCCATTC |
| CRISPR2 | SF370     | ATTTCAATCCACTCACCCATGAAGGGTGAGAC     | CTTTCAATCCACTCACCCATGAAGGGTGAGAC               |
|         | MGAS5005  | ATTTCAATCCACTCACCCATGAAGGGTGAGAC     | CTTTCAATCCACTCACCCATGAAGGGTGAGAC               |
|         | MGAS10270 | ATTTCAATCCACTCACCCATGAAGGGTGAGAC     | CTTTCAATCCACTCACCCATGAAGGGTGAGAC               |
|         | MGAS10750 | ATTTCAATCCACTCACCCATGAAGGGTGAGAC     | CTTTCAATCCACTCACCCATGAAGGGTGAGAC               |
|         | MGAS2096  | ATTTCAATCCACTCACCCATGAAGGGTGAGAC     | CTTTCAATCCACTCACCCATGAAGGGTGAGAC               |
|         | MGAS9429  | ATTTCAATCCACTCACCCATGAAGGGTGAGAC     | CTTTCAATCCACTCACCCATGAAGGGTGAGAC               |
|         | MGAS6180  | ATTTCAATCCACTCACCCATGAAGGGTGAGAC     | CTTTCAATCCACTCACCCATGAAGGGTGAGAC               |
|         | NZ131     | ATTTCAATCCACTCACCCATGAAGGGTGAGAC     | CTTTCAATCCACTCACCCATGAAGGGTGAGAC               |

<sup>a</sup> Bold characters are different bases from the most frequent sequence.

<sup>b</sup> The absence of typical repeat sequence is shown.
