# Supplementary material for: CRISPR Inhibition of Prophage Acquisition in Streptococcus pyogenes
Source: PubMed Central journal article supplement (PMC3089615; doi:10.1371/journal.pone.0019543), 2011-05-06
Supplement: pone.0019543.s006.pdf [file pone.0019543.s006.pdf]

**Table S2. Characteristics of CRISPR loci of Streptococci.**

| Species                | CRISPR  | Repeat cluster <sup>a</sup> | Repeat size (bp) | Repeat number per locus   | Repeats number per genome | Spacer size (bp)        | Distribution (%) <sup>c</sup> |
|------------------------|---------|-----------------------------|------------------|---------------------------|---------------------------|-------------------------|-------------------------------|
| <i>S. agalactiae</i>   | CRISPR1 | 10                          | 36               | 18.0 (14-25) <sup>b</sup> | 18.0                      | 30 (29-31) <sup>b</sup> | 100 (3/3)                     |
| <i>S. disgalactiae</i> | CRISPR1 | 10                          | 36               | 19                        | 19                        | 30                      | 100 (1/1)                     |
| <i>S. equi</i>         | CRISPR1 | 3                           | 32               | 19                        | 23.5                      | 33 (33-37) <sup>b</sup> | 33.3 (1/3)                    |
|                        | CRISPR2 | 3                           | 32               | 10                        |                           | 35 (33-35)              | 33.3 (1/3)                    |
|                        | CRISPR3 | 10                          | 36               | 18                        |                           | 30                      | 33.3 (1/3)                    |
| <i>S. gallolyticus</i> | CRISPR1 | 10                          | 36               | 14.5 (13-16) <sup>b</sup> | 29                        | 30 (29-30) <sup>b</sup> | 100 (1/1)                     |
| <i>S. gordonii</i>     | CRISPR1 | 10                          | 36               | 27                        | 27                        | 30 (29-31) <sup>b</sup> | 100 (1/1)                     |
| <i>S. mutans</i>       | CRISPR1 | 10                          | 36               | 19.4 (4-70) <sup>b</sup>  | 20.2                      | 30 (28-31) <sup>b</sup> | 70.4 (19/27)                  |
|                        | CRISPR2 | 3                           | 32               | 18.2 (2-51) <sup>b</sup>  |                           | 34 (33-36) <sup>b</sup> | 33.3 (9/27)                   |
| <i>S. pyogenes</i>     | CRISPR1 | 10                          | 36               | 3.3 (1-7) <sup>b</sup>    | 6.6                       | 30 (30-31) <sup>b</sup> | 76.9 (10/13)                  |
|                        | CRISPR2 | 3                           | 32               | 5.2 (2-8) <sup>b</sup>    |                           | 35 (33-36) <sup>b</sup> | 61.5 (8/13)                   |
| <i>S. sanguinis</i>    | CRISPR1 | 8                           | 29               | 14 (2-21) <sup>b</sup>    | 42                        | 43 (41-47) <sup>b</sup> | 100 (1/1)                     |
| <i>S. thermophilus</i> | CRISPR1 | 10                          | 36               | 23.9 (3-52) <sup>b</sup>  | 36                        | 30 (29-32) <sup>b</sup> | 100 (124/124)                 |
|                        | CRISPR2 | 8                           | 36               | 3.9 (1-9) <sup>b</sup>    |                           | 36                      | 90.8 (59/65)                  |
|                        | CRISPR3 | 16                          | 36               | 14.2 (1-30) <sup>b</sup>  |                           | 30 (30-32) <sup>b</sup> | 80.3 (53/66)                  |

<sup>a</sup> Repeat clusters were defined according to Kunin et al [32].

<sup>b</sup> (min-max)

<sup>c</sup> The rate of CRISPR-harboring strains was shown. Addition to the information of sequenced strains in this study, we added the data of *S. mutans* and *S. thermophilus* [20, 42].
